# Supplementary material
Source: PubMed Central journal article supplement (PMC8087149)
Supplement: NIHMS1692302-supplement-1.pdf [file NIHMS1692302-supplement-1.pdf]

Table S1. Results of the overall multiple regression linear model predicting psychological distress with demographic and loneliness variables among the four study regions.

|                                         | <i>b</i> | $\beta$ | <i>SE</i> | <i>T</i> | <i>P</i> ≤ |
|-----------------------------------------|----------|---------|-----------|----------|------------|
| (Intercept)                             | -10.81   | 0.00    | 2.069524  | -5.221   | 0.001      |
| South Korea                             | -7.68    | -0.53   | 3.017002  | -2.546   | 0.01       |
| France                                  | 8.29     | 0.40    | 3.425437  | 2.42     | 0.02       |
| Hong Kong                               | -8.02    | -0.54   | 3.152594  | -2.542   | 0.01       |
| Age                                     | -0.06    | -0.13   | 0.021132  | -2.984   | 0.003      |
| Sex                                     | 1.09     | 0.07    | 0.727111  | 1.496    | 0.13       |
| Education                               | -0.34    | -0.02   | 0.805692  | -0.425   | 0.67       |
| Employment                              | -1.33    | -0.10   | 0.717103  | -1.85    | 0.06       |
| Single living alone                     | 1.43     | 0.08    | 0.776101  | 1.849    | 0.06       |
| Single living with family               | 0.18     | 0.01    | 0.898231  | 0.201    | 0.84       |
| Concern for COVID                       | 1.27     | 0.15    | 0.42339   | 3.007    | 0.003      |
| UCLA Loneliness                         | 0.23     | 0.42    | 0.027905  | 8.198    | 0.001      |
| South Korea x Age                       | 0.05     | 0.13    | 0.045153  | 1.201    | 0.23       |
| France x Age                            | -0.09    | -0.20   | 0.038327  | -2.309   | 0.02       |
| Hong Kong x Age                         | 0.05     | 0.13    | 0.041901  | 1.243    | 0.21       |
| South Korea x Sex                       | 1.25     | 0.08    | 0.965063  | 1.298    | 0.19       |
| France x Sex                            | 0.16     | 0.01    | 1.411784  | 0.114    | 0.91       |
| Hong Kong x Sex                         | -0.92    | -0.05   | 0.9374    | -0.982   | 0.33       |
| South Korea x Education                 | 1.01     | 0.05    | 1.006495  | 1.005    | 0.32       |
| France x Education                      | 1.84     | 0.08    | 1.394363  | 1.319    | 0.19       |
| Hong Kong x Education                   | -0.42    | -0.03   | 1.031518  | -0.406   | 0.68       |
| South Korea by employment               | 1.94     | 0.09    | 0.96037   | 2.018    | 0.04       |
| France x Employment                     | -0.96    | -0.04   | 1.49896   | -0.641   | 0.52       |
| Hong Kong x Employment                  | 1.01     | 0.06    | 0.968578  | 1.044    | 0.30       |
| South Korea x Single living alone       | -0.94    | -0.04   | 1.361447  | -0.691   | 0.49       |
| France x Single living alone            | -0.15    | 0.00    | 1.402428  | -0.107   | 0.92       |
| Hong Kong x Single living alone         | -3.19    | -0.07   | 1.404293  | -2.274   | 0.02       |
| South Korea x Single living with family | 0.52     | 0.03    | 1.418154  | 0.365    | 0.71       |
| France x Single living with family      | 1.95     | 0.03    | 1.943545  | 1.005    | 0.32       |
| Hong Kong x Single living with family   | -0.46    | -0.03   | 1.214832  | -0.381   | 0.70       |
| South Korea x COVID Concern             | -0.34    | -0.05   | 0.555275  | -0.615   | 0.54       |
| France x COVID Concern                  | 0.84     | 0.07    | 0.681448  | 1.239    | 0.22       |
| Hong Kong x COVID Concern               | 1.39     | 0.22    | 0.577366  | 2.4      | 0.02       |
| South Korea x UCLA Loneliness           | 0.09     | 0.29    | 0.035991  | 2.526    | 0.01       |
| France x UCLA Loneliness                | -0.13    | -0.24   | 0.049389  | -2.686   | 0.01       |
| Hong Kong x UCLA Loneliness             | 0.10     | 0.34    | 0.039934  | 2.43     | 0.02       |
